# Supplementary material for: Loss of Arabidopsis thaliana Dynamin-Related Protein 2B Reveals Separation of Innate Immune Signaling Pathways
Source: PubMed Central journal article supplement (PMC4270792; doi:10.1371/journal.ppat.1004578), 2014-12-18
Supplement: ppat.1004578.s002.pdf [file ppat.1004578.s002.pdf]

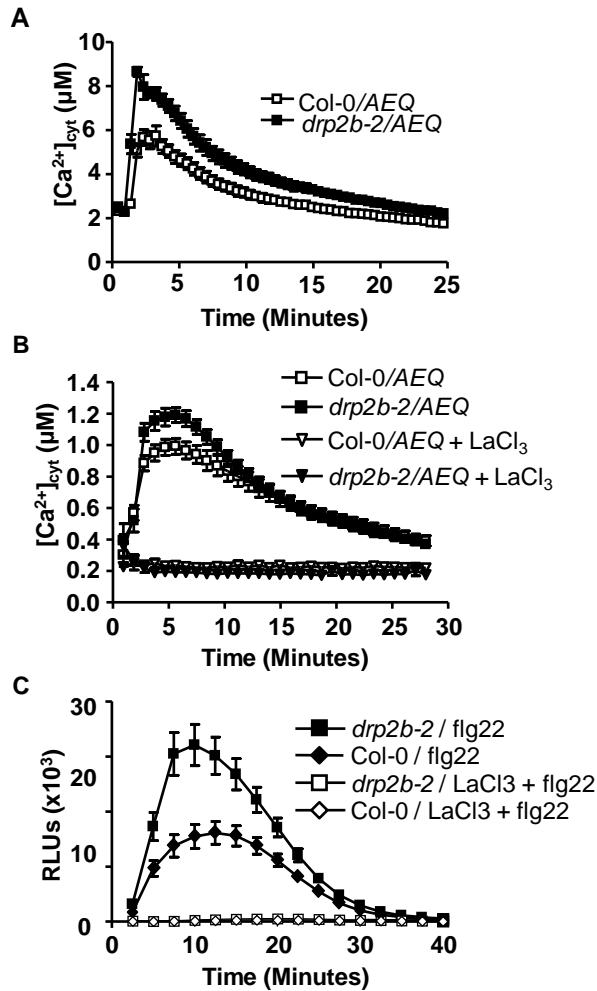

**Figure S2. Treatment with the calcium channel blocker  $LaCl_3$  abolishes flg22-induced increases in cytosolic  $Ca^{2+}$  levels and ROS production.**

(A) After  $0.1\mu M$  flg22 elicitation, cytosolic  $Ca^{2+}$  levels were significantly elevated in leaf discs from 4-5 week old *drp2b-2* expressing the  $Ca^{2+}$ -reporter Aequorin (*drp2b-2*/AEQ; closed symbols) compared to Col-0 expressing AEQ (Col-0/AEQ; open symbols). ( $n= 6/$  genotype and treatment). (B)  $LaCl_3$  abolished flg22-induced elevations of cytosolic  $Ca^{2+}$  levels to similar levels in *drp2b-2*/AEQ (closed symbols) compared to Col-0/AEQ (open symbols). 8-day old plants were pretreated with  $10mM$   $LaCl_3$  (triangles) or water (squares) for 30 minutes, washed with water and then elicited with  $0.1\mu M$  flg22. ( $n= 6/$  genotype and treatment). (C)  $LaCl_3$  abolished flg22-induced ROS production to similar levels in *drp2b-2* (square) compared to Col-0 (diamond). Leaf discs from 4-5 week old plants were pretreated with  $1mM$   $LaCl_3$  (open symbols) or water (closed symbols) for 30 minutes, washed with water and then elicited with  $0.1\mu M$  flg22. ( $n= 24/$  genotype and treatment). For all experiments, values are mean  $\pm$  SE. Each experiment was repeated more than three independent times with similar results. Statistical analysis was done as in Figure S1.
