# Supplementary material for: Loss of Arabidopsis thaliana Dynamin-Related Protein 2B Reveals Separation of Innate Immune Signaling Pathways
Source: PubMed Central journal article supplement (PMC4270792; doi:10.1371/journal.ppat.1004578), 2014-12-18
Supplement: ppat.1004578.s005.pdf [file ppat.1004578.s005.pdf]

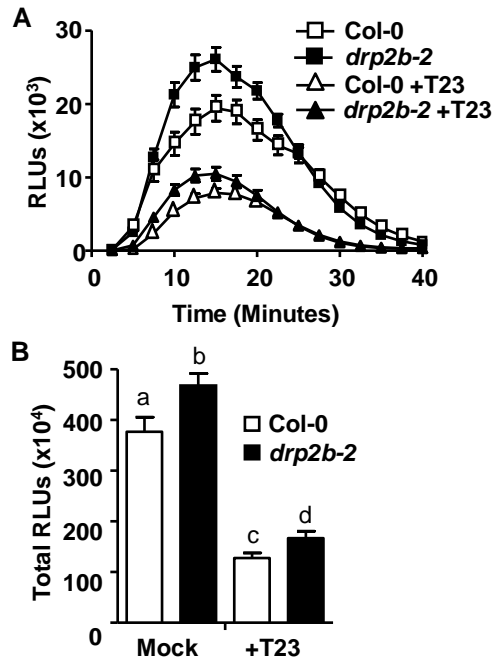

**Figure S5. For *drp2b*, the increase in flg22-induced ROS production is not fully sensitive to Tyrphostin A23.**

(A) After a one-hour pretreatment in the absence (square) or presence (triangle) of 100 $\mu$ M Tyrphostin A23 (T23), ROS production was measured over 40 minutes in *drp2b-2* (closed symbols) and Col-0 (open symbols) in response to 1 $\mu$ M flg22 ( $n=24/$  treatment and genotype). (B) Total ROS production based on time-course experiments shown in (A) indicates that in *drp2b-2* (black bars), the increase in flg22-induced ROS production was not completely TyrA23-sensitive (*drp2b-2*+T23 vs Col-0+T23,  $P<0.025$ ). Experiments were done using 4-5 week old leaf tissue and repeated at least 3 independent times with similar results. Values are mean  $\pm$  SE. Statistical analysis was done as in Figure S1. Relative Light Units, RLU.
