# Supplementary material for: Loss of Arabidopsis thaliana Dynamin-Related Protein 2B Reveals Separation of Innate Immune Signaling Pathways
Source: PubMed Central journal article supplement (PMC4270792; doi:10.1371/journal.ppat.1004578), 2014-12-18
Supplement: ppat.1004578.s006.pdf [file ppat.1004578.s006.pdf]

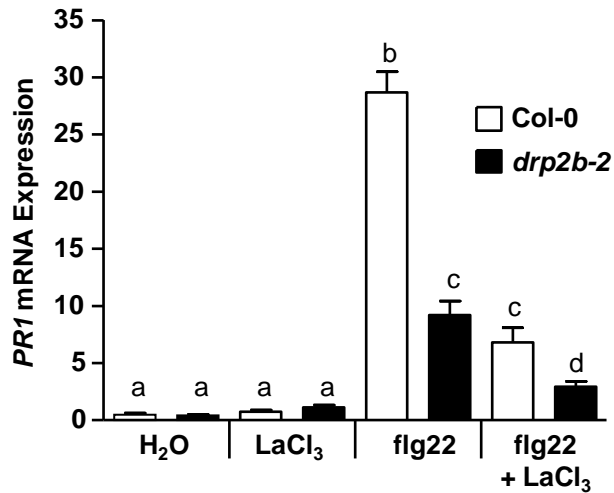

**Figure S6. The Ca<sup>2+</sup> channel blocker LaCl<sub>3</sub> further reduces flg22-induced *PR1* mRNA levels in *drp2b-2*.**

Using qRT-PCR with *At2g28390* as the reference gene, flg22-induced *PR1* mRNA levels were significantly reduced in *drp2b-2* (black bars) compared to Col-0 (white bars) 24hr after co-treatment with flg22 and LaCl<sub>3</sub> ( $P < 0.05$ ). Eight-day-old seedlings were treated with water, 10 mM LaCl<sub>3</sub>, 1  $\mu$ M flg22 or co-treatment with 10 mM LaCl<sub>3</sub> and 1  $\mu$ M flg22 (flg22+ LaCl<sub>3</sub>). Water and LaCl<sub>3</sub> treatment served as a controls. Data represent the mean  $\pm$  SE of four or more independent experiments ( $n \geq 12$ ). Statistical analysis was done as in Figure S1.
