# Supplementary material for: Loss of Arabidopsis thaliana Dynamin-Related Protein 2B Reveals Separation of Innate Immune Signaling Pathways
Source: PubMed Central journal article supplement (PMC4270792; doi:10.1371/journal.ppat.1004578), 2014-12-18
Supplement: ppat.1004578.s007.pdf [file ppat.1004578.s007.pdf]

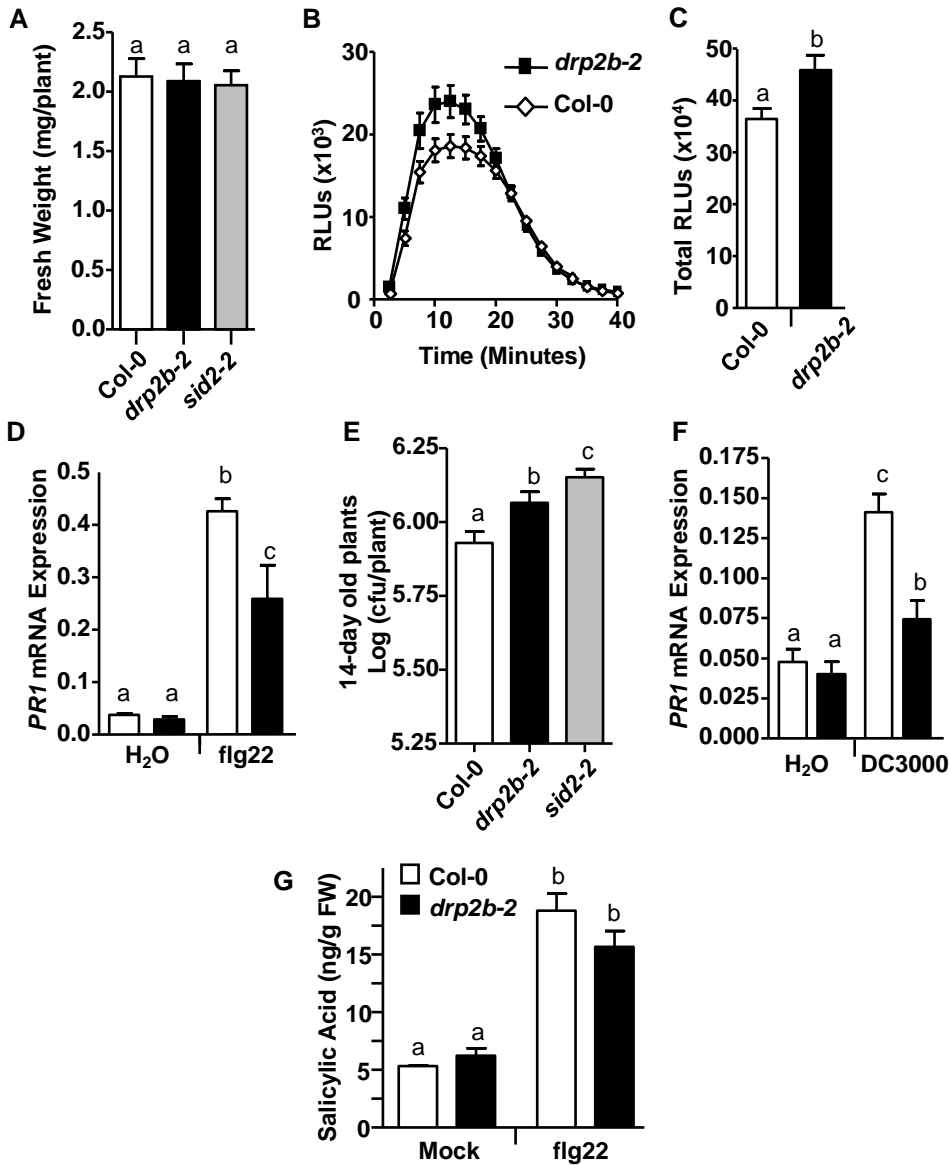

**Figure S7. 14-day old *drp2b-2* plants display similar phenotypic defects in response to flg22 or *Pto* DC3000 as described for 5-6 week old *drp2b-2* plants.**

(A) No significant difference in the fresh weight of 14-day old plants was observed between *drp2b-2* (black bar) and *sid2-2* (gray bar) compared to Col-0 (white bar) ( $P > 0.5$ ). ( $n = 21/\text{genotype}$ ). (B) In time-course experiments, ROS production was elevated in 14-day old *drp2b-2* plants (filled shapes) compared to Col-0 (open shapes) in response to  $0.1 \mu\text{M}$  flg22. ( $n = 32/\text{genotype}$ ). (C) In 14-day old plants, total ROS production was significantly increased in *drp2b-2* plants (black bar) compared to Col-0 (white bar) after elicitation with  $0.1 \mu\text{M}$  flg22 ( $P < 0.01$ ). Data were based on time-course experiment shown in Figure (B). (D) Using qRT-PCR with *At2g28390* as the reference gene, *PR1* mRNA levels were significantly reduced in *drp2b-2* (black bars) compared to Col-0 (white bars) at 24hr after treatment with  $1 \mu\text{M}$  flg22 ( $P < 0.05$ ). Treatment with water served as mock control. ( $n = 4/\text{genotype and treatment}$ ). (E) Compared to Col-0 (white bars), bacterial growth was significantly increased in 14-day old *drp2b-2* plants (black bar) at 3 dpi with *Pto* DC3000lux ( $\text{OD}_{600} = 0.0005$ ) as measured by serial dilution plating ( $P < 0.05$ ). *sid2-2* (gray bar) served as positive control ( $P < 0.0001$ ). ( $n = 8/\text{genotype}$ ). (F) Using qRT-PCR, *PR1* mRNA levels were significantly reduced in *drp2b-2* (black bars) compared to Col-0 (white bars) at 24 hr after treatment with *Pto* DC3000lux ( $\text{OD}_{600} = 0.0005$ ) ( $P < 0.009$ ). Treatment with water (white bars) served as mock control.

### Figure S7 continued.

(n=4/genotype). (G) Levels of SA in Col-0 (white bars) and *drp2b-2* (black bars) 12-day old plants treated for 24 hr with 1  $\mu$ M flg22 + 0.1% DMSO in water (P=0.2; n=3/genotype; each n contained 25 seedlings). Treatment with 0.1% DMSO in water served as mock control (P=0.3; n=2/genotype; each n contained 25 seedlings). Experiment was repeated twice with similar results. Unless stated differently, all experiments were done using 14-day old plants and repeated at least 3 independent times with similar results. Values are mean  $\pm$  SE, and statistical analysis was done as in Figure S1. ROS experiments shown in the same panel were performed in the same 96-well plate at the same time to allow for direct comparison. Relative Light Units, RLU.
