# Supplementary material for: Loss of Arabidopsis thaliana Dynamin-Related Protein 2B Reveals Separation of Innate Immune Signaling Pathways
Source: PubMed Central journal article supplement (PMC4270792; doi:10.1371/journal.ppat.1004578), 2014-12-18
Supplement: ppat.1004578.s009.pdf [file ppat.1004578.s009.pdf]

| <b>Purpose</b> | <b>Primer Name</b> | <b>Sequence (5'-3')</b>       |
|----------------|--------------------|-------------------------------|
| genotyping     | drp2b-2 F          | ATAGCCTAATTGGGCATCCAG         |
| genotyping     | drp2b-2 R          | TATAGCATCGTTGTGCTGTGC         |
| genotyping     | drp2a-1 F          | GGTTGATAACCATCTGCCTCC         |
| genotyping     | drp2a-1 R          | AAACAACCTGACATTCCATGGG        |
| genotyping     | drp2b-5 F          | TTGCTATGTGTTTGTGATTGAAAC      |
| genotyping     | drp2b-5 R          | GACAAAGGCATCAAGCAGTTC         |
| genotyping     | drp2a-3 F          | CCTCCTTTCAAGCGAGAGG           |
| genotyping     | drp2a-3 R          | TGCTTTTTTGGTATAGCCAAGC        |
| genotyping     | Apoaequorin F      | ATACCAATCCAACCCTAATCCTAAAATAC |
| genotyping     | Apoaequorin R      | TATTATAAGAAGGTTTCTCTTTTCTCCTA |
| genotyping     | AtrbohD F          | ATGAAAATGAGACGAGGCAATTC       |
| genotyping     | AtrbohD R          | GGATACTGATCATAGGCGTGGCTCCA    |
| genotyping     | LBb1               | GCGTGGACCGCTTGCTGCAACT        |
| genotyping     | FLS2-3xMyc-EGFP F  | AAACTTGAGGACACCATTAC          |
| genotyping     | FLS2-3xMyc-EGFP R  | TGTTACCGTTCAAGTCTTCCTC        |
| genotyping     | sid2-2 F1          | TTCTTCATGCAGGGGAGGAG          |
| genotyping     | sid2-2 F2          | CAACCACCTGGTGCACCAGC          |
| genotyping     | sid2-2 R           | AAGCAAAATGTTTGTGAGTCAGCA      |
| qRT-PCR        | AtrbohD F          | TCGGTGACTGGACACGTAAGC         |
| qRT-PCR        | AtrbohD R          | GTTGCAACGACTGAAGCATGG         |
| qRT-PCR        | FLS2 F             | TCTGATGAACTTAGAGGCAAAGCG      |
| qRT-PCR        | FLS2 R             | CGTAACAGAGTTTGGCAAAGTCG       |
| qRT-PCR        | FRK1 F             | ATCTTCGCTTGAGCTTCTC           |
| qRT-PCR        | FRK1 R             | TGCAGCGCAAGGACTAGAG           |
| qRT-PCR        | PHI1 F             | TTGGTTTAGACGGGATGGTG          |
| qRT-PCR        | PHI1 R             | ACTCCAGTACAAGCCGATCC          |
| qRT-PCR        | PR1 F              | GCAATGGAGTTTGTGGTCAC          |
| qRT-PCR        | PR1 R              | GTTACATAATTCCCACGAGG          |
| qRT-PCR        | At2g28390 F        | AACTCTATGCAGCATTTGATCCACT     |
| qRT-PCR        | At2g28390 R        | TGATTGCATATCTTTATCGCCATC      |
| qRT-PCR        | WRKY33 F           | AGCAAAGAGATGGAAAGGGGACAA      |
| qRT-PCR        | WRKY33 R           | GCACTACGATTCTCGGCTCTCTCA      |
| qRT-PCR        | WRKY40 F           | TGCGAGTTGAAGAAGATCCACCGA      |
| qRT-PCR        | WRKY40 R           | TCCGAGAGCTTCTTGTCTCAGCA       |
| qRT-PCR        | PER62 F            | GCGATCTCGTCACTCTTGTTG         |
| qRT-PCR        | PER62 R            | CGTGATAAACCCACATGCAG          |
| qRT-PCR        | PER4 F             | GCGATCTCGTCACTCTTGTTG         |
| qRT-PCR        | PER4 R             | CGTGATAAACCCACATGCAG          |
| qRT-PCR        | NHL10 R            | TTCTGTCCGTAACCCAAAC           |
| qRT-PCR        | NHL10              | CCCTCGTAGTAGGCATGAGC          |

**Table S1** List of oligonucleotide sequences used as primers.
